# Supplementary material for: Aipl1 is required for cone photoreceptor function and survival through the stability of Pde6c and Gc3 in zebrafish
Source: PubMed Central journal article supplement (PMC5381001; doi:10.1038/srep45962), 2017-04-05
Supplement: srep45962-s1.pdf [file srep45962-s1.pdf]

## **Supplementary materials**

**Aipl1 is required for cone photoreceptor function and survival through the stability of Pde6c and Gc3 in zebrafish**

Maria Iribarne, Yuko Nishiwaki, Shohei Nakamura, Masato Araragi, Eri Oguri, and Ichiro Masai

**Supplementary figures: Figure S1-5**

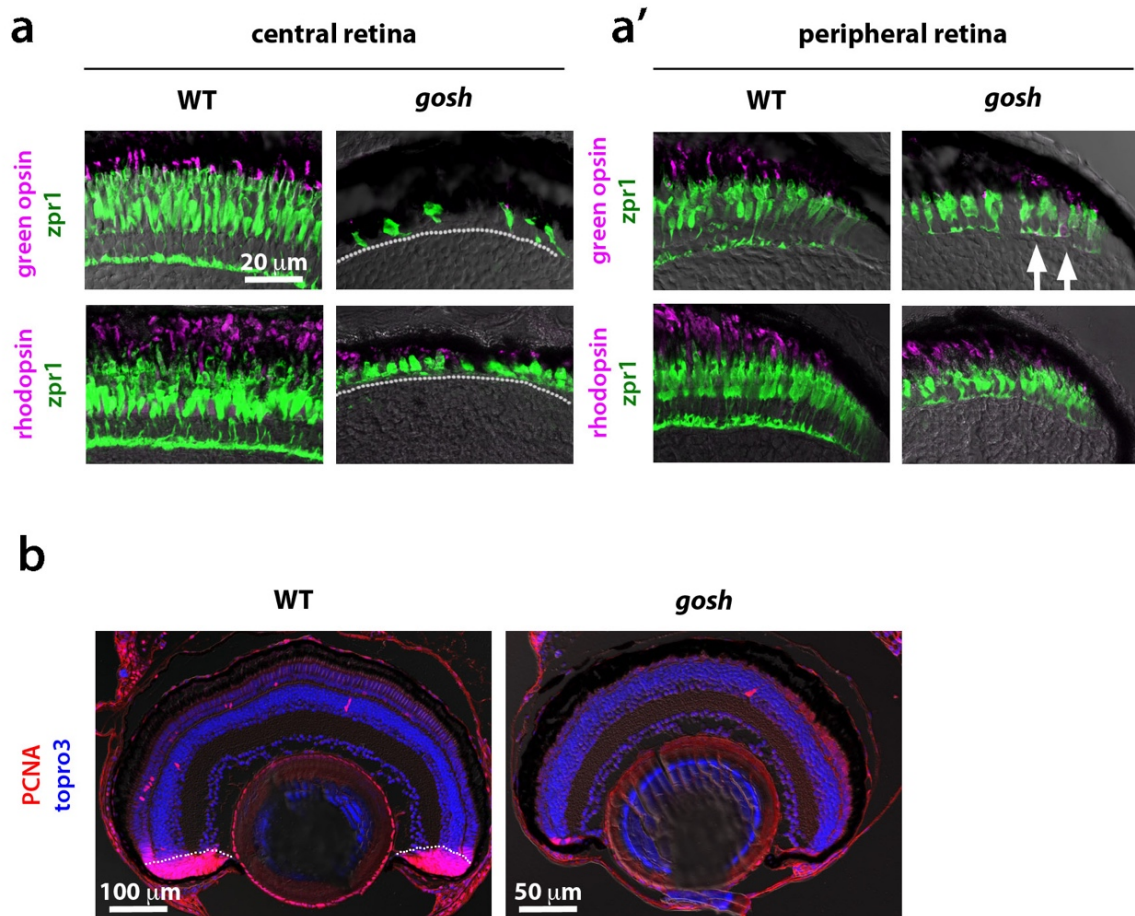

**Figure S1. Degeneration of cone and rod photoreceptors at 4 wpf in the *gosh* mutant**

- (a) Labeling of wild-type and *gosh* mutant retinas at 4 wpf with green opsin and zpr1 antibodies, or rhodopsin and zpr1 antibodies. In wild-type central retina, the ONL is thicker than at 7 dpf to segregate rod and cone nuclear layers. Its cone shape is highly elongated. Opsin and rhodopsin are localized in the OS. In *gosh* mutant central retina, the ONL is very thin, and cones are fewer in number and abnormal in shape. (a') In wild-type peripheral retina, new rod and cone photoreceptors are generated and express rhodopsin and opsin, respectively. In *gosh* mutant peripheral retina, cones become columnar although their thickness is still less than in wild type retina. Green opsin and rhodopsin are detected; however, green opsin is mislocalized through the cell body (arrows). A dotted line indicates the boundary between photoreceptor cells and INL.
- (b) Labeling of wild-type and *gosh* mutant retinas of 2 wpf with PCNA antibody (red). Nuclei are counter-stained with TOPRO3 (blue). In wild-type retina, most of the CMZ express PCNA, indicating cell proliferation of retinal stem and progenitor cells (dotted line). In wild-type retina, PCNA positive cells are observed just beneath the ONL and in the INL, which correspond to rod progenitors and Müller cell-derived regenerating progenitors, respectively. In contrast, PCNA expression is reduced in the *gosh* mutant CMZ, in the number of rod progenitors and Müller cell-derived regenerating progenitors, suggesting that retinal regeneration is not active in the *gosh* mutant at 2 wpf.

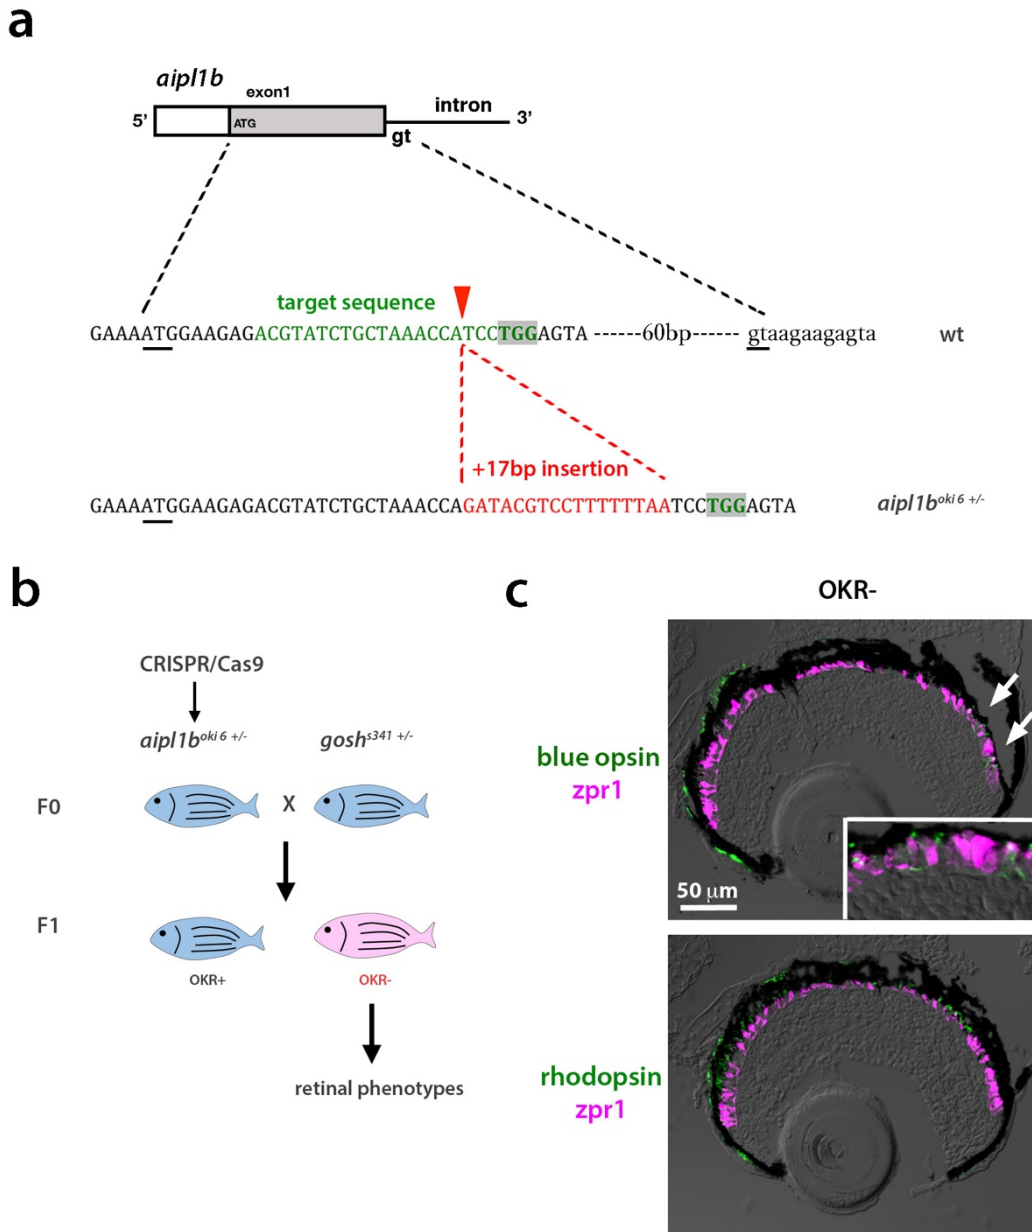

**Figure S2. Generation of a new allele of the *gosh* mutant using the CRISPR/Cas9 system**

- (a) Sequence of exon1 of the *aipl1b* gene in embryos showing no OKR response. A 17-bp insertion causes a frame-shift of the coding region, which subsequently induces a premature stop codon.
- (b) Diagram showing the strategy used to confirm that *gosh* mutant gene encodes *aipl1b*.
- (c) Labeling of retinas of 7-dpf no-OKR zebrafish embryos with anti-blue opsin and *zpr1* antibodies or anti-rhodopsin and *zpr1* antibodies. Photoreceptors are abnormal in shape, and blue opsin is mislocalized to the plasma membrane of the cell body (arrows). However, rhodopsin is normally localized at the OS.

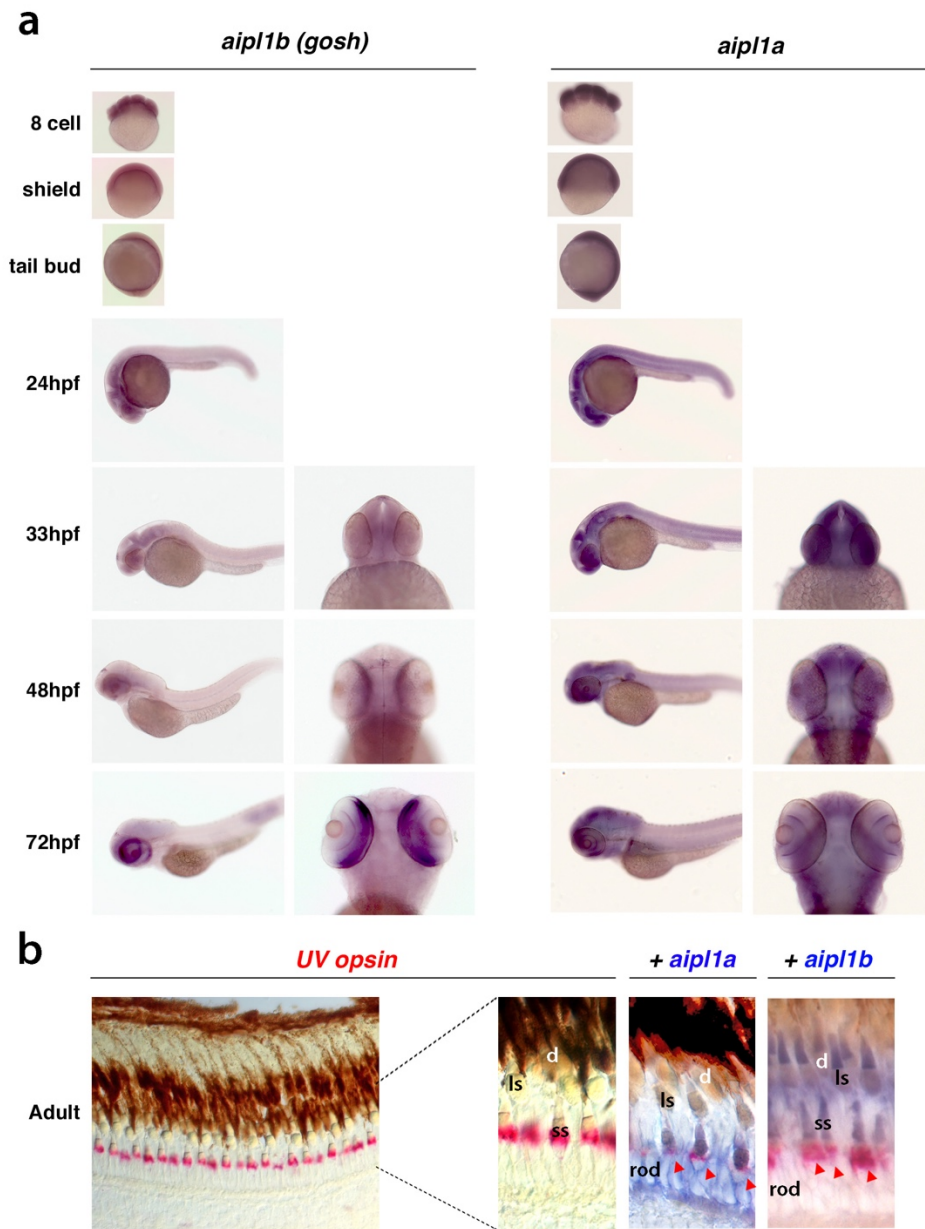

**Figure S3. Expression of *aipl1* mRNA during embryonic development**

- (a) Whole-mount *in situ* hybridization of wild-type embryos from the 8-cell stage to 72 hpf using *aipl1b* and *aipl1a* RNA probes.
- (b) (Left panel) *In situ* hybridization of cryo-sectioned wild-type adult retina with *UV opsin* RNA probe (red). UV opsin is expressed in short single cones, which are regularly located just above the nuclear layer of rod photoreceptors. (Right panels) Wild-type adult retinas were co-labeled with the *UV opsin* RNA probe (red), and the *aipl1a* or *aipl1b* probe (blue). *aipl1a* and *aipl1b* mRNAs are expressed in rods and cones, respectively. Only short single cones are positive for both *aipl1a* and *aipl1b* probes (red arrowhead). Abbreviation: ss, single short cone; ls, long single cone; d, double cone.

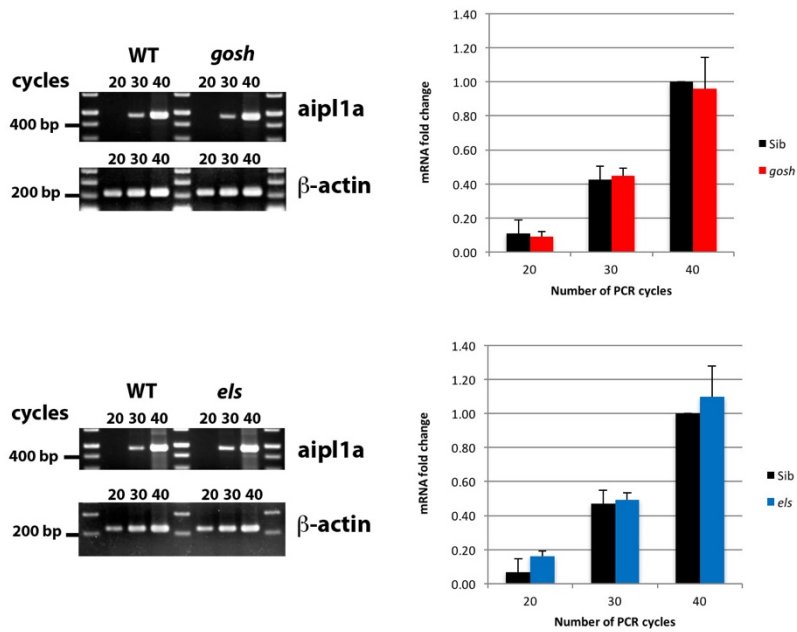

**Figure S4. *Aipl1a* expression in *gosh* and *els* mutants is similar to that of wild type animals**  
 Semi-quantitative PCR of *aipl1a* in wild type and *gosh* (upper panel) or *els* (lower panel) mutants at 7 dpf. PCR amplification at 20, 30, or 40 cycles is shown in lanes of electrophoresis (left panels). *Aipl1a* mRNA level is similar between wild-type and *gosh* or *els* mutant samples.  $\beta$ -actin is used as a control.

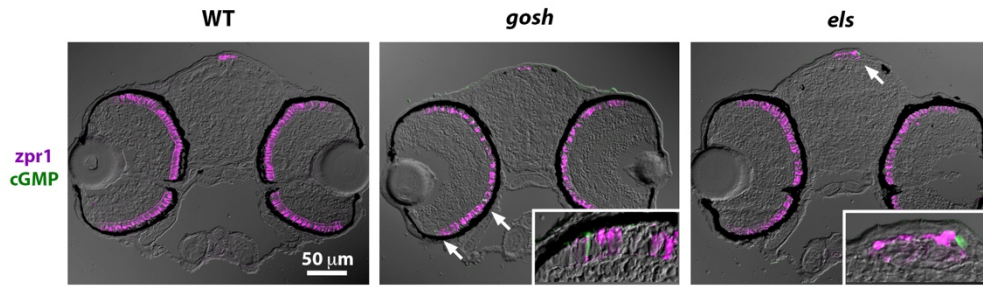

**Figure S5. Labeling of wild-type, *gosh*, and *els* mutant retinas with anti-cGMP antibody**  
Cryo-sectioned heads of 4-dpf wild-type, *gosh*, and *els* mutant embryos are labeled with anti-formaldehyde-fixed cGMP antibody (green) and *zpr1* antibody (magenta). As in 7-dpf samples (Fig. 5a), wild-type, *gosh*, and *els* mutant retinas show undetectable levels of cGMP, although a few photoreceptors with high levels of cGMP were occasionally observed in the CMZ of *gosh* and *els* mutant retinas (arrows in *gosh* mutant panel). High levels of cGMP were observed in pineal photoreceptors in both mutants (arrow in *els* mutant panel).
